# Supplementary material for: Fabrication of graphene wrapped ZnIn2S4microspheres heterojunction with enhanced interfacial contact and its improved photocatalytic performance
Source: Royal Society of Chemistry journal article supplement (doi:10.1039/c3dt52820k), 2013-11-15
Supplement: c3dt52820k.pdf [file c3dt52820k.pdf]

## Supplementary Information

### **Fabrication of graphene wrapping ZnIn<sub>2</sub>S<sub>4</sub> microspheres heterojunction with enhanced interfacial contact and its improved photocatalytic performance**

Houfen Li, Hongtao Yu, Shuo Chen, Huimin Zhao, Yaobin Zhang, Xie Quan\*

Key Laboratory of Industrial Ecology and Environmental Engineering (Ministry of Education), School of Environmental Science and Technology, Dalian University of Technology, Dalian 116024, China

Correspondence\*

Xie Quan. Dalian, China. Fax: +86-411-84706263; Tel: +86-411-84706140; E-mail: [quanxie@dlut.edu.cn](mailto:quanxie@dlut.edu.cn)

### UV-vis absorbance spectrum of as-prepared ZnIn<sub>2</sub>S<sub>4</sub>

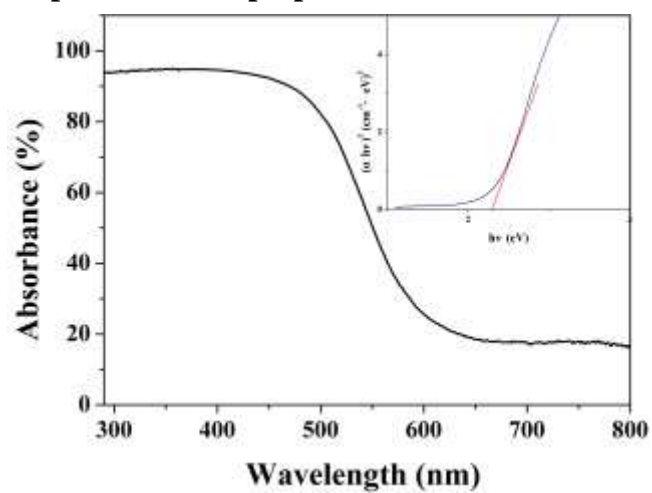

Figure S1. UV-vis absorbance spectrum of as-prepared ZnIn<sub>2</sub>S<sub>4</sub>.

### **Calculation of electron affinity of ZnIn<sub>2</sub>S<sub>4</sub>**

In general, the electron affinity of semiconductor was equal to the conduction band potential vs vacuum level.

The conduction band edge potential ( $E_{CB}$ ) of ZnIn<sub>2</sub>S<sub>4</sub> was calculated to be -0.75 eV (vs NHE) according to the empirical equations:  $E_{CB} = E_{VB} - E_g$  and  $E_{VB} = X - E_e + 0.5 E_g$ ;

where  $E_{VB}$  is the valence band edge potential;

X is the electronegativity of the semiconductor (4.82 eV for ZnIn<sub>2</sub>S<sub>4</sub>);

$E_e$  is the energy of free electrons on the hydrogen scale (~4.5 eV);

$E_g$ , the band gap energy of the ZnIn<sub>2</sub>S<sub>4</sub>, is 2.15 eV in our experiment.

Therefore, the electron affinity of ZnIn<sub>2</sub>S<sub>4</sub> is 3.75 eV.

### Energy-Dispersive Spectroscopy (EDS) of $\text{ZnIn}_2\text{S}_4$

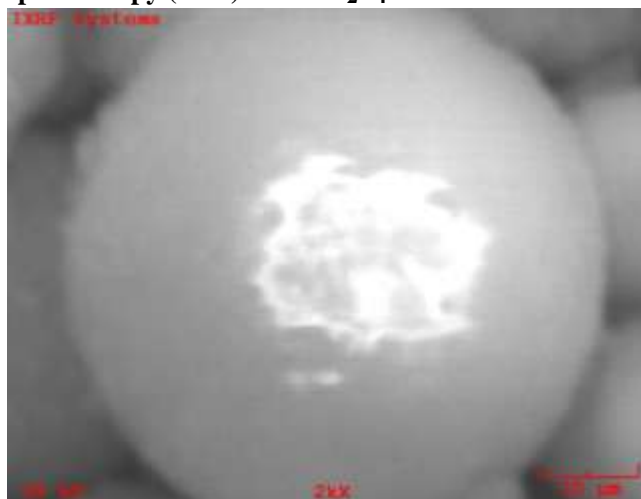

Figure S2. The selected area of EDS

Table S1. EDS results of  $\text{ZnIn}_2\text{S}_4$

| Elt. | Line | Intensity<br>(c/s) | Conc    | Units | Error<br>2-sig | MDL<br>3-sig |       |
|------|------|--------------------|---------|-------|----------------|--------------|-------|
| S    | Ka   | 420.37             | 26.376  | wt.%  | 2.160          | .900         |       |
| Zn   | Ka   | 69.98              | 15.375  | wt.%  | 4.951          | 1.193        |       |
| In   | La   | 477.73             | 58.249  | wt.%  | 1.097          | .758         |       |
|      |      |                    | 100.000 | wt.%  |                |              | Total |

### Raman spectrum of ZnIn<sub>2</sub>S<sub>4</sub>@2 wt% Gr

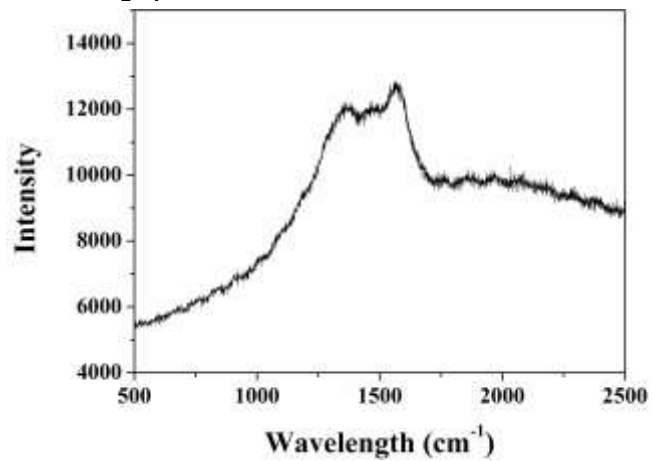

Figure S3. Raman spectrum of ZnIn<sub>2</sub>S<sub>4</sub>@2 wt% Gr
